# Supplementary material
Source: PubMed Central journal article supplement (PMC4185914)

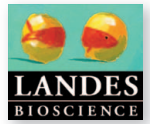

## **Supplemental Material to:**

**Shuang Wang, Bin Wu, Jia Xue, Ming Wang, Ruiai Chen,  
and Bin Wang**

**Nizatidine, a small molecular compound, enhances killed  
H5N1 vaccine cell-mediated responses and protects mice  
from lethal viral challenge**

**2013; 10(2)**

**<http://dx.doi.org/10.4161/hv.27165>**

**[www.landesbioscience.com/journals/vaccines/article/27165](http://www.landesbioscience.com/journals/vaccines/article/27165)**

**Supplementary Figure 1.** Analysis of antigen-specific cytokine production in CD8<sup>+</sup> T cells. Splenic cells were isolated from C57BL/6 mice (n=6) on day 7 after immunization and stimulated with NP peptide (NP366–374 peptide representing the CD8<sup>+</sup> T-cell epitope ASNENMETM) for 6 h in culture. (A) Intracellular staining for IFN- $\gamma$  gated CD8<sup>+</sup> cells was analyzed by FACS. (B) The percentages of positive-stained cells are summarized as the means from three independent experiments. All data are presented as mean  $\pm$  SD. \*p<0.05 compared with mice immunized with the killed H5N1 antigen alone.

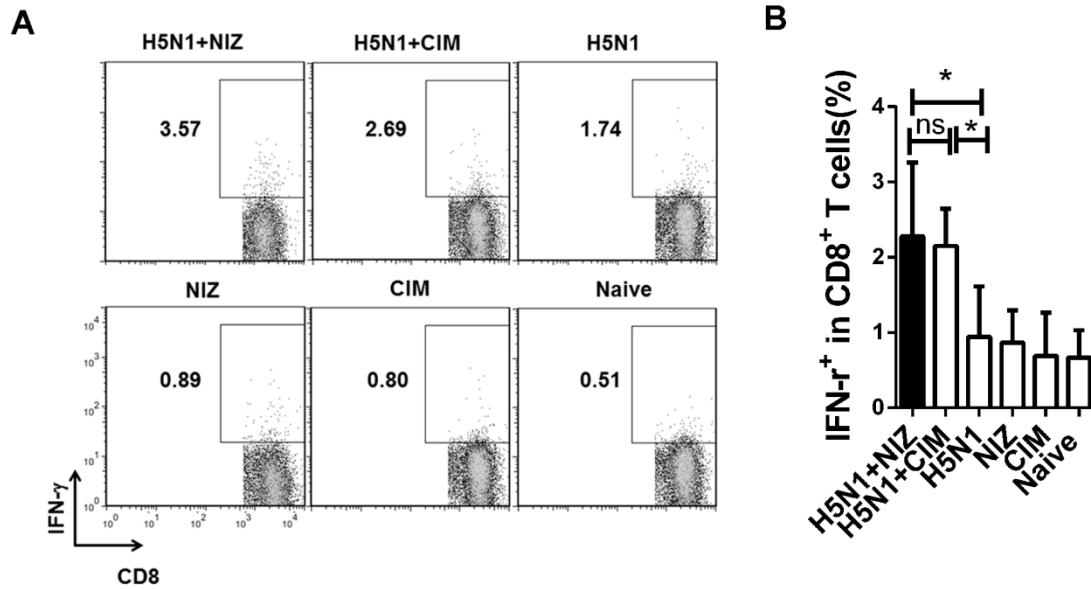

**Supplementary Figure 2.** Analysis of splenocytes of C57BL/6 mice after immunization with H5N1 with or without NIZ. Samples were collected on day 1 after immunization and stimulated by 1 ug/ml H5N1 killed antigen for 12 h in vitro. The CD11c<sup>+</sup> cells were gated and analyzed CD80, CD86, CD40, and MHC-II in total CD11c<sup>+</sup> cells. All data are presented as mean ± SD. \*p<0.05 compared with mice immunized with the killed H5N1 antigen alone.

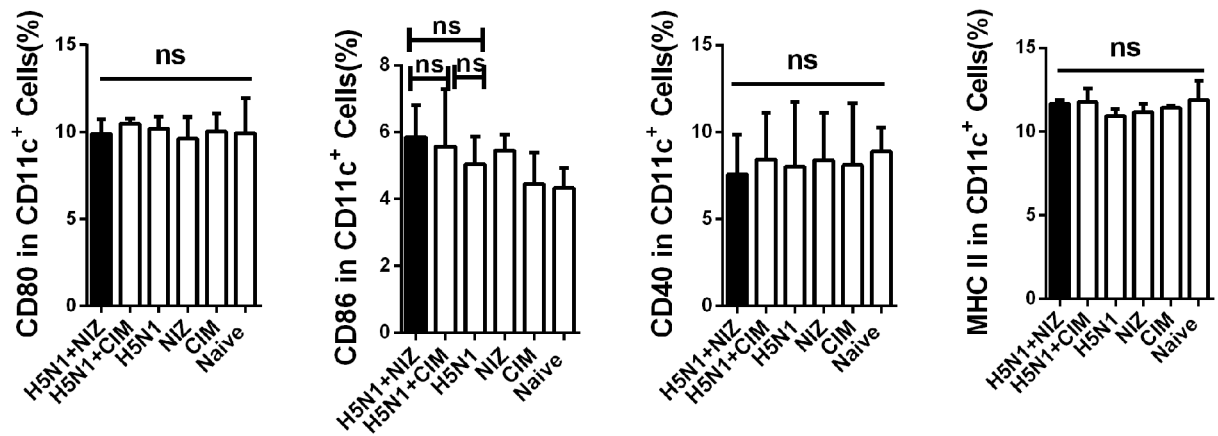

Supplement: hvi-10-461-s01.pdf [file hvi-10-461-s01.pdf]
